# Supplementary material
Source: publisher figshare collection journal article supplement (https://acs.figshare.com/ndownloader/files/4020673)
Supplement: Supplementary file 1 [file 4020673]

data_global

# SUBMISSION DETAILS

_publ_contact_author_name            
'Edwin Weber'   # Name of author for correspondence
_publ_contact_author_address             # Address of author for correspondence
; 
Institut f\"ur Organische Chemie
TU Bergakademie Freiberg
Leipziger Strasse 29
D-09596 Freiberg/Sachsen
Germany
;
_publ_contact_author_email           'edwin.weber@chemie-tu.freiberg.de'
_publ_contact_author_fax             '+493731393170'
_publ_contact_author_phone           '+493731392386'

_publ_requested_journal              'Crystal Growth & Design'


# TITLE AND AUTHOR LIST

_publ_section_title
; Host polymorphs and crystalline host guest complexes of
3,3'-bis(9-hydroxy-9-fluorenyl)biphenyl.
;
_publ_section_title_footnote  # remove if not required
        
 
# The loop structure below should contain the names and addresses of all 
# authors, in the required order of publication. Repeat as necessary.

# NB if using publCIF, the Author database tool might prove useful
# (see the Tools menu in publCIF)

;
loop
;
loop_
_publ_author_name
_publ_author_address
_publ_author_email
_publ_author_footnote

'Skobridis, Konstantinos'      
;
Department of Chemistry
University of Ioannina
GR-451 10 Ioannina
Greece
; 
.
.
'Theodorou, Vassiliki'      
;
Department of Chemistry
University of Ioannina
GR-451 10 Ioannina
Greece
; 
.
.
'Seichter, Wilhelm'
;
Institut f\"ur Organische Chemie
TU Bergakademie Freiberg
Leipziger Strasse 29
D-09596 Freiberg/Sachsen
Germany
;
.
.
'Weber, Edwin'
;
Institut f\"ur Organische Chemie
TU Bergakademie Freiberg
Leipziger Strasse 29
D-09596 Freiberg/Sachsen
Germany
;
.
.
 _publ_section_abstract
;
The diol host compound 2 featuring a structure with two 9-fluorenol
moieties attached in 3,3'-position to a biphenyl core unit has been
synthesized and is shown to form crystalline inclusion complexes with
organic guest molecules. Aside from the single-crystal x-ray structures
of unsolvated 2 in two polymorphous forms (2A, 2B), structures of five
inclusion compounds with 1,4-dioxane (2a), DMSO (2b), diethylamine
(2c), acetic acid (2d) and ethyl acetate (2e) are described and 
comparatively discussed in the interaction behaviour including
corresponding host compounds with different attachment mode of the
biphenyl unit or being the diphenylhydroxymethyl substituted equivalent.
;
#====================================================   
 
data_skob_109a_0m 
 
_audit_creation_method            SHELXL-97 
_chemical_name_systematic 
; 
 ? 
; 
_chemical_name_common             ? 
_chemical_melting_point           ? 
_chemical_formula_moiety          'C38 H26 O2, 3(C4 H8 O2)' 
_chemical_formula_sum 
 'C50 H50 O8' 
_chemical_formula_weight          778.90 
 
loop_ 
 _atom_type_symbol 
 _atom_type_description 
 _atom_type_scat_dispersion_real 
 _atom_type_scat_dispersion_imag 
 _atom_type_scat_source 
 'C'  'C'   0.0033   0.0016 
 'International Tables Vol C Tables 4.2.6.8 and 6.1.1.4' 
 'H'  'H'   0.0000   0.0000 
 'International Tables Vol C Tables 4.2.6.8 and 6.1.1.4' 
 'O'  'O'   0.0106   0.0060 
 'International Tables Vol C Tables 4.2.6.8 and 6.1.1.4' 
 
_symmetry_cell_setting            triclinic 
_symmetry_space_group_name_H-M    'P -1'
_symmetry_space_group_name_Hall   '-P 1' 
 
loop_ 
 _symmetry_equiv_pos_as_xyz 
 'x, y, z' 
 '-x, -y, -z' 
 
_cell_length_a                    8.3229(2) 
_cell_length_b                    8.4570(2) 
_cell_length_c                    15.3718(3) 
_cell_angle_alpha                 95.525(1) 
_cell_angle_beta                  91.841(1) 
_cell_angle_gamma                 111.525(1) 
_cell_volume                      999.17(4) 
_cell_formula_units_Z             1 
_cell_measurement_temperature     100(2) 
_cell_measurement_reflns_used     9893 
_cell_measurement_theta_min       2.61 
_cell_measurement_theta_max       31.50 
 
_exptl_crystal_description        irregular 
_exptl_crystal_colour             colourless 
_exptl_crystal_size_max           0.48 
_exptl_crystal_size_mid           0.33 
_exptl_crystal_size_min           0.13 
_exptl_crystal_density_meas       ? 
_exptl_crystal_density_diffrn     1.294 
_exptl_crystal_density_method     'not measured' 
_exptl_crystal_F_000              414 
_exptl_absorpt_coefficient_mu     0.087 
_exptl_absorpt_correction_type    none 
_exptl_absorpt_correction_T_min   ? 
_exptl_absorpt_correction_T_max   ? 
_exptl_absorpt_process_details    ? 
 
_exptl_special_details 
; 
 ? 
; 
 
_diffrn_ambient_temperature       100(2) 
_diffrn_radiation_wavelength      0.71073 
_diffrn_radiation_type            MoK\a 
_diffrn_radiation_source          'fine-focus sealed tube' 
_diffrn_radiation_monochromator   graphite 
_diffrn_measurement_device_type   'CCD area detector' 
_diffrn_measurement_method        'phi and omega scans' 
_diffrn_detector_area_resol_mean  ? 
_diffrn_reflns_number             21153 
_diffrn_reflns_av_R_equivalents   0.0263 
_diffrn_reflns_av_sigmaI/netI     0.0257 
_diffrn_reflns_limit_h_min        -11 
_diffrn_reflns_limit_h_max        11 
_diffrn_reflns_limit_k_min        -11 
_diffrn_reflns_limit_k_max        11 
_diffrn_reflns_limit_l_min        -20 
_diffrn_reflns_limit_l_max        21 
_diffrn_reflns_theta_min          1.33 
_diffrn_reflns_theta_max          29.10 
_reflns_number_total              5347 
_reflns_number_gt                 4469 
_reflns_threshold_expression      >2sigma(I) 
 
_computing_data_collection        'Kappa APEX 2 (Bruker-AXS)' 
_computing_cell_refinement        'SAINT-NT (Sheldrick, 2008)' 
_computing_data_reduction         'SAINT' 
_computing_structure_solution     'SHELXS-97 (Sheldrick, 2008)' 
_computing_structure_refinement   'SHELXL-97 (Sheldrick, 2008)' 
_computing_molecular_graphics     'ORTEP-3 (Farrugia)' 
_computing_publication_material   'SHELXTL' 
 
_refine_special_details 
; 
 Refinement of F^2^ against ALL reflections.  The weighted R-factor wR and 
 goodness of fit S are based on F^2^, conventional R-factors R are based 
 on F, with F set to zero for negative F^2^. The threshold expression of 
 F^2^ > 2sigma(F^2^) is used only for calculating R-factors(gt) etc. and is 
 not relevant to the choice of reflections for refinement.  R-factors based 
 on F^2^ are statistically about twice as large as those based on F, and R- 
 factors based on ALL data will be even larger. 
; 
 
_refine_ls_structure_factor_coef  Fsqd  
_refine_ls_matrix_type            full 
_refine_ls_weighting_scheme       calc  
_refine_ls_weighting_details 
 'calc w=1/[\s^2^(Fo^2^)+(0.0593P)^2^+0.2846P] where P=(Fo^2^+2Fc^2^)/3' 
_atom_sites_solution_primary      direct 
_atom_sites_solution_secondary    difmap 
_atom_sites_solution_hydrogens    geom 
_refine_ls_hydrogen_treatment     constr 
_refine_ls_extinction_method      none 
_refine_ls_extinction_coef        ? 
_refine_ls_number_reflns          5347 
_refine_ls_number_parameters      263 
_refine_ls_number_restraints      0 
_refine_ls_R_factor_all           0.0497 
_refine_ls_R_factor_gt            0.0397 
_refine_ls_wR_factor_ref          0.1133 
_refine_ls_wR_factor_gt           0.1036 
_refine_ls_goodness_of_fit_ref    1.046 
_refine_ls_restrained_S_all       1.046 
_refine_ls_shift/su_max           0.000 
_refine_ls_shift/su_mean          0.000 
 
loop_ 
 _atom_site_label 
 _atom_site_type_symbol 
 _atom_site_fract_x 
 _atom_site_fract_y 
 _atom_site_fract_z 
 _atom_site_U_iso_or_equiv 
 _atom_site_adp_type 
 _atom_site_occupancy 
 _atom_site_symmetry_multiplicity 
 _atom_site_calc_flag 
 _atom_site_refinement_flags 
 _atom_site_disorder_assembly 
 _atom_site_disorder_group 
O1 O 0.84305(10) 0.93898(9) 0.36317(5) 0.01800(17) Uani 1 1 d . . . 
H1 H 0.9013 1.0270 0.3406 0.027 Uiso 1 1 calc R . . 
C1 C 0.83490(13) 0.73305(13) 0.23526(7) 0.0147(2) Uani 1 1 d . . . 
C2 C 0.66966(14) 0.67469(14) 0.19446(7) 0.0186(2) Uani 1 1 d . . . 
H2 H 0.5743 0.6765 0.2263 0.022 Uiso 1 1 calc R . . 
C3 C 0.64593(15) 0.61335(15) 0.10584(8) 0.0221(2) Uani 1 1 d . . . 
H3 H 0.5335 0.5749 0.0768 0.027 Uiso 1 1 calc R . . 
C4 C 0.78487(15) 0.60761(15) 0.05914(8) 0.0232(2) Uani 1 1 d . . . 
H4 H 0.7659 0.5638 -0.0011 0.028 Uiso 1 1 calc R . . 
C5 C 0.95155(14) 0.66557(14) 0.10011(7) 0.0195(2) Uani 1 1 d . . . 
H5 H 1.0465 0.6617 0.0685 0.023 Uiso 1 1 calc R . . 
C6 C 0.97516(13) 0.72915(13) 0.18842(7) 0.0149(2) Uani 1 1 d . . . 
C7 C 1.13355(13) 0.80351(13) 0.24777(7) 0.0148(2) Uani 1 1 d . . . 
C8 C 1.30540(13) 0.83368(14) 0.23196(7) 0.0182(2) Uani 1 1 d . . . 
H8 H 1.3356 0.7977 0.1765 0.022 Uiso 1 1 calc R . . 
C9 C 1.43179(14) 0.91812(14) 0.29981(8) 0.0213(2) Uani 1 1 d . . . 
H9 H 1.5501 0.9411 0.2903 0.026 Uiso 1 1 calc R . . 
C10 C 1.38728(14) 0.96931(14) 0.38124(8) 0.0215(2) Uani 1 1 d . . . 
H10 H 1.4759 1.0283 0.4263 0.026 Uiso 1 1 calc R . . 
C11 C 1.21429(14) 0.93545(14) 0.39796(7) 0.0185(2) Uani 1 1 d . . . 
H11 H 1.1839 0.9688 0.4539 0.022 Uiso 1 1 calc R . . 
C12 C 1.08876(13) 0.85190(13) 0.33050(7) 0.0146(2) Uani 1 1 d . . . 
C13 C 0.89284(13) 0.80082(13) 0.33174(7) 0.0145(2) Uani 1 1 d . . . 
C14 C 0.81123(13) 0.65504(13) 0.38719(7) 0.0148(2) Uani 1 1 d . . . 
C15 C 0.87984(15) 0.52860(14) 0.39230(8) 0.0212(2) Uani 1 1 d . . . 
H15 H 0.9803 0.5348 0.3630 0.025 Uiso 1 1 calc R . . 
C16 C 0.80106(16) 0.39341(15) 0.44038(8) 0.0245(2) Uani 1 1 d . . . 
H16 H 0.8480 0.3072 0.4439 0.029 Uiso 1 1 calc R . . 
C17 C 0.65449(15) 0.38365(14) 0.48315(7) 0.0200(2) Uani 1 1 d . . . 
H17 H 0.6037 0.2920 0.5170 0.024 Uiso 1 1 calc R . . 
C18 C 0.57976(13) 0.50614(13) 0.47744(6) 0.0142(2) Uani 1 1 d . . . 
C19 C 0.66179(13) 0.64238(13) 0.42891(7) 0.0151(2) Uani 1 1 d . . . 
H19 H 0.6142 0.7279 0.4245 0.018 Uiso 1 1 calc R . . 
O1A O 0.22970(11) 0.30454(12) 0.15004(6) 0.0282(2) Uani 1 1 d . . . 
O2A O 0.02030(11) 0.23815(11) 0.29349(5) 0.02264(18) Uani 1 1 d . . . 
C1A C 0.29579(15) 0.28209(15) 0.23301(8) 0.0233(2) Uani 1 1 d . . . 
H1A1 H 0.4212 0.3519 0.2418 0.028 Uiso 1 1 calc R . . 
H1A2 H 0.2805 0.1605 0.2339 0.028 Uiso 1 1 calc R . . 
C2A C 0.20320(15) 0.33464(15) 0.30622(8) 0.0234(2) Uani 1 1 d . . . 
H2A1 H 0.2482 0.3151 0.3629 0.028 Uiso 1 1 calc R . . 
H2A2 H 0.2254 0.4583 0.3081 0.028 Uiso 1 1 calc R . . 
C3A C -0.04603(16) 0.25850(17) 0.21003(9) 0.0272(3) Uani 1 1 d . . . 
H3A1 H -0.0317 0.3797 0.2084 0.033 Uiso 1 1 calc R . . 
H3A2 H -0.1712 0.1877 0.2011 0.033 Uiso 1 1 calc R . . 
C4A C 0.04813(16) 0.20542(18) 0.13785(8) 0.0293(3) Uani 1 1 d . . . 
H4A1 H 0.0284 0.0826 0.1375 0.035 Uiso 1 1 calc R . . 
H4A2 H 0.0021 0.2216 0.0806 0.035 Uiso 1 1 calc R . . 
O1B O 0.65168(11) 0.15050(11) 0.00461(6) 0.0273(2) Uani 1 1 d . . . 
C1B C 0.51407(16) 0.13898(16) 0.05987(9) 0.0288(3) Uani 1 1 d . . . 
H1B1 H 0.5077 0.2534 0.0727 0.035 Uiso 1 1 calc R . . 
H1B2 H 0.5379 0.1008 0.1161 0.035 Uiso 1 1 calc R . . 
C2B C 0.65683(16) -0.01491(16) -0.01686(10) 0.0292(3) Uani 1 1 d . . . 
H2B1 H 0.6847 -0.0576 0.0371 0.035 Uiso 1 1 calc R . . 
H2B2 H 0.7494 -0.0072 -0.0570 0.035 Uiso 1 1 calc R . . 
 
loop_ 
 _atom_site_aniso_label 
 _atom_site_aniso_U_11 
 _atom_site_aniso_U_22 
 _atom_site_aniso_U_33 
 _atom_site_aniso_U_23 
 _atom_site_aniso_U_13 
 _atom_site_aniso_U_12 
O1 0.0187(4) 0.0145(3) 0.0222(4) 0.0049(3) 0.0084(3) 0.0066(3) 
C1 0.0135(5) 0.0144(4) 0.0154(5) 0.0043(4) 0.0020(4) 0.0036(4) 
C2 0.0135(5) 0.0191(5) 0.0224(5) 0.0050(4) 0.0022(4) 0.0042(4) 
C3 0.0166(5) 0.0227(5) 0.0225(6) 0.0034(4) -0.0046(4) 0.0023(4) 
C4 0.0237(6) 0.0235(5) 0.0166(5) 0.0016(4) -0.0015(4) 0.0026(4) 
C5 0.0193(5) 0.0209(5) 0.0165(5) 0.0027(4) 0.0035(4) 0.0050(4) 
C6 0.0130(4) 0.0152(5) 0.0157(5) 0.0042(4) 0.0019(4) 0.0036(4) 
C7 0.0133(5) 0.0146(4) 0.0160(5) 0.0040(4) 0.0017(4) 0.0040(4) 
C8 0.0148(5) 0.0184(5) 0.0223(5) 0.0043(4) 0.0047(4) 0.0063(4) 
C9 0.0120(5) 0.0213(5) 0.0306(6) 0.0074(4) 0.0012(4) 0.0051(4) 
C10 0.0167(5) 0.0197(5) 0.0241(5) 0.0052(4) -0.0041(4) 0.0020(4) 
C11 0.0192(5) 0.0174(5) 0.0168(5) 0.0033(4) 0.0003(4) 0.0041(4) 
C12 0.0126(4) 0.0143(4) 0.0163(5) 0.0050(4) 0.0029(4) 0.0036(4) 
C13 0.0128(4) 0.0152(4) 0.0156(5) 0.0033(4) 0.0037(4) 0.0047(4) 
C14 0.0143(5) 0.0149(4) 0.0135(4) 0.0022(4) 0.0025(4) 0.0032(4) 
C15 0.0210(5) 0.0197(5) 0.0258(6) 0.0071(4) 0.0119(4) 0.0090(4) 
C16 0.0270(6) 0.0197(5) 0.0332(6) 0.0101(5) 0.0143(5) 0.0133(5) 
C17 0.0226(5) 0.0162(5) 0.0226(5) 0.0065(4) 0.0095(4) 0.0072(4) 
C18 0.0133(5) 0.0142(4) 0.0130(4) 0.0010(4) 0.0022(4) 0.0026(4) 
C19 0.0147(5) 0.0159(5) 0.0145(5) 0.0032(4) 0.0023(4) 0.0050(4) 
O1A 0.0247(4) 0.0343(5) 0.0230(4) 0.0083(4) 0.0077(3) 0.0063(4) 
O2A 0.0234(4) 0.0224(4) 0.0232(4) 0.0080(3) 0.0083(3) 0.0080(3) 
C1A 0.0203(5) 0.0219(5) 0.0270(6) 0.0048(4) 0.0036(4) 0.0065(4) 
C2A 0.0249(6) 0.0197(5) 0.0227(6) 0.0015(4) 0.0024(4) 0.0052(4) 
C3A 0.0226(6) 0.0304(6) 0.0315(7) 0.0129(5) 0.0044(5) 0.0107(5) 
C4A 0.0259(6) 0.0359(7) 0.0215(6) 0.0058(5) 0.0012(5) 0.0055(5) 
O1B 0.0239(4) 0.0197(4) 0.0352(5) 0.0015(3) 0.0115(4) 0.0040(3) 
C1B 0.0271(6) 0.0223(6) 0.0331(7) -0.0014(5) 0.0122(5) 0.0052(5) 
C2B 0.0230(6) 0.0241(6) 0.0408(7) 0.0028(5) 0.0099(5) 0.0088(5) 
 
_geom_special_details 
; 
 All esds (except the esd in the dihedral angle between two l.s. planes) 
 are estimated using the full covariance matrix.  The cell esds are taken 
 into account individually in the estimation of esds in distances, angles 
 and torsion angles; correlations between esds in cell parameters are only 
 used when they are defined by crystal symmetry.  An approximate (isotropic) 
 treatment of cell esds is used for estimating esds involving l.s. planes. 
; 
 
loop_ 
 _geom_bond_atom_site_label_1 
 _geom_bond_atom_site_label_2 
 _geom_bond_distance 
 _geom_bond_site_symmetry_2 
 _geom_bond_publ_flag 
O1 C13 1.4247(12) . ? 
O1 H1 0.8400 . ? 
C1 C2 1.3839(14) . ? 
C1 C6 1.4000(14) . ? 
C1 C13 1.5323(14) . ? 
C2 C3 1.3911(16) . ? 
C2 H2 0.9500 . ? 
C3 C4 1.3938(17) . ? 
C3 H3 0.9500 . ? 
C4 C5 1.3953(16) . ? 
C4 H4 0.9500 . ? 
C5 C6 1.3911(15) . ? 
C5 H5 0.9500 . ? 
C6 C7 1.4729(14) . ? 
C7 C8 1.3915(14) . ? 
C7 C12 1.4022(14) . ? 
C8 C9 1.3925(16) . ? 
C8 H8 0.9500 . ? 
C9 C10 1.3909(17) . ? 
C9 H9 0.9500 . ? 
C10 C11 1.3987(16) . ? 
C10 H10 0.9500 . ? 
C11 C12 1.3833(15) . ? 
C11 H11 0.9500 . ? 
C12 C13 1.5272(14) . ? 
C13 C14 1.5274(14) . ? 
C14 C19 1.3916(14) . ? 
C14 C15 1.3918(15) . ? 
C15 C16 1.3881(15) . ? 
C15 H15 0.9500 . ? 
C16 C17 1.3840(15) . ? 
C16 H16 0.9500 . ? 
C17 C18 1.3980(14) . ? 
C17 H17 0.9500 . ? 
C18 C19 1.4040(14) . ? 
C18 C18 1.4920(19) 2_666 ? 
C19 H19 0.9500 . ? 
O1A C1A 1.4295(15) . ? 
O1A C4A 1.4295(15) . ? 
O2A C3A 1.4308(15) . ? 
O2A C2A 1.4352(14) . ? 
C1A C2A 1.5061(16) . ? 
C1A H1A1 0.9900 . ? 
C1A H1A2 0.9900 . ? 
C2A H2A1 0.9900 . ? 
C2A H2A2 0.9900 . ? 
C3A C4A 1.5049(18) . ? 
C3A H3A1 0.9900 . ? 
C3A H3A2 0.9900 . ? 
C4A H4A1 0.9900 . ? 
C4A H4A2 0.9900 . ? 
O1B C2B 1.4225(15) . ? 
O1B C1B 1.4281(14) . ? 
C1B C2B 1.5073(18) 2_655 ? 
C1B H1B1 0.9900 . ? 
C1B H1B2 0.9900 . ? 
C2B C1B 1.5073(18) 2_655 ? 
C2B H2B1 0.9900 . ? 
C2B H2B2 0.9900 . ? 
 
loop_ 
 _geom_angle_atom_site_label_1 
 _geom_angle_atom_site_label_2 
 _geom_angle_atom_site_label_3 
 _geom_angle 
 _geom_angle_site_symmetry_1 
 _geom_angle_site_symmetry_3 
 _geom_angle_publ_flag 
C13 O1 H1 109.5 . . ? 
C2 C1 C6 120.63(10) . . ? 
C2 C1 C13 128.47(9) . . ? 
C6 C1 C13 110.85(9) . . ? 
C1 C2 C3 118.69(10) . . ? 
C1 C2 H2 120.7 . . ? 
C3 C2 H2 120.7 . . ? 
C2 C3 C4 120.88(10) . . ? 
C2 C3 H3 119.6 . . ? 
C4 C3 H3 119.6 . . ? 
C3 C4 C5 120.62(10) . . ? 
C3 C4 H4 119.7 . . ? 
C5 C4 H4 119.7 . . ? 
C6 C5 C4 118.32(10) . . ? 
C6 C5 H5 120.8 . . ? 
C4 C5 H5 120.8 . . ? 
C5 C6 C1 120.84(10) . . ? 
C5 C6 C7 130.75(10) . . ? 
C1 C6 C7 108.39(9) . . ? 
C8 C7 C12 120.86(10) . . ? 
C8 C7 C6 130.52(10) . . ? 
C12 C7 C6 108.59(9) . . ? 
C7 C8 C9 118.06(10) . . ? 
C7 C8 H8 121.0 . . ? 
C9 C8 H8 121.0 . . ? 
C10 C9 C8 120.93(10) . . ? 
C10 C9 H9 119.5 . . ? 
C8 C9 H9 119.5 . . ? 
C9 C10 C11 121.12(10) . . ? 
C9 C10 H10 119.4 . . ? 
C11 C10 H10 119.4 . . ? 
C12 C11 C10 117.94(10) . . ? 
C12 C11 H11 121.0 . . ? 
C10 C11 H11 121.0 . . ? 
C11 C12 C7 121.05(10) . . ? 
C11 C12 C13 128.16(10) . . ? 
C7 C12 C13 110.79(9) . . ? 
O1 C13 C12 113.20(8) . . ? 
O1 C13 C14 107.65(8) . . ? 
C12 C13 C14 112.53(8) . . ? 
O1 C13 C1 113.94(8) . . ? 
C12 C13 C1 101.05(8) . . ? 
C14 C13 C1 108.41(8) . . ? 
C19 C14 C15 119.47(9) . . ? 
C19 C14 C13 120.14(9) . . ? 
C15 C14 C13 120.29(9) . . ? 
C16 C15 C14 119.84(10) . . ? 
C16 C15 H15 120.1 . . ? 
C14 C15 H15 120.1 . . ? 
C17 C16 C15 120.31(10) . . ? 
C17 C16 H16 119.8 . . ? 
C15 C16 H16 119.8 . . ? 
C16 C17 C18 121.26(10) . . ? 
C16 C17 H17 119.4 . . ? 
C18 C17 H17 119.4 . . ? 
C17 C18 C19 117.58(9) . . ? 
C17 C18 C18 121.13(11) . 2_666 ? 
C19 C18 C18 121.28(11) . 2_666 ? 
C14 C19 C18 121.51(9) . . ? 
C14 C19 H19 119.2 . . ? 
C18 C19 H19 119.2 . . ? 
C1A O1A C4A 109.51(9) . . ? 
C3A O2A C2A 110.47(9) . . ? 
O1A C1A C2A 110.71(10) . . ? 
O1A C1A H1A1 109.5 . . ? 
C2A C1A H1A1 109.5 . . ? 
O1A C1A H1A2 109.5 . . ? 
C2A C1A H1A2 109.5 . . ? 
H1A1 C1A H1A2 108.1 . . ? 
O2A C2A C1A 110.43(9) . . ? 
O2A C2A H2A1 109.6 . . ? 
C1A C2A H2A1 109.6 . . ? 
O2A C2A H2A2 109.6 . . ? 
C1A C2A H2A2 109.6 . . ? 
H2A1 C2A H2A2 108.1 . . ? 
O2A C3A C4A 110.35(10) . . ? 
O2A C3A H3A1 109.6 . . ? 
C4A C3A H3A1 109.6 . . ? 
O2A C3A H3A2 109.6 . . ? 
C4A C3A H3A2 109.6 . . ? 
H3A1 C3A H3A2 108.1 . . ? 
O1A C4A C3A 110.54(11) . . ? 
O1A C4A H4A1 109.5 . . ? 
C3A C4A H4A1 109.5 . . ? 
O1A C4A H4A2 109.5 . . ? 
C3A C4A H4A2 109.5 . . ? 
H4A1 C4A H4A2 108.1 . . ? 
C2B O1B C1B 109.60(9) . . ? 
O1B C1B C2B 111.02(10) . 2_655 ? 
O1B C1B H1B1 109.4 . . ? 
C2B C1B H1B1 109.4 2_655 . ? 
O1B C1B H1B2 109.4 . . ? 
C2B C1B H1B2 109.4 2_655 . ? 
H1B1 C1B H1B2 108.0 . . ? 
O1B C2B C1B 111.19(10) . 2_655 ? 
O1B C2B H2B1 109.4 . . ? 
C1B C2B H2B1 109.4 2_655 . ? 
O1B C2B H2B2 109.4 . . ? 
C1B C2B H2B2 109.4 2_655 . ? 
H2B1 C2B H2B2 108.0 . . ? 
 
loop_ 
 _geom_torsion_atom_site_label_1 
 _geom_torsion_atom_site_label_2 
 _geom_torsion_atom_site_label_3 
 _geom_torsion_atom_site_label_4 
 _geom_torsion 
 _geom_torsion_site_symmetry_1 
 _geom_torsion_site_symmetry_2 
 _geom_torsion_site_symmetry_3 
 _geom_torsion_site_symmetry_4 
 _geom_torsion_publ_flag 
C6 C1 C2 C3 -0.50(15) . . . . ? 
C13 C1 C2 C3 -177.97(10) . . . . ? 
C1 C2 C3 C4 1.16(17) . . . . ? 
C2 C3 C4 C5 -0.87(18) . . . . ? 
C3 C4 C5 C6 -0.08(17) . . . . ? 
C4 C5 C6 C1 0.73(16) . . . . ? 
C4 C5 C6 C7 -177.70(11) . . . . ? 
C2 C1 C6 C5 -0.44(15) . . . . ? 
C13 C1 C6 C5 177.43(9) . . . . ? 
C2 C1 C6 C7 178.30(9) . . . . ? 
C13 C1 C6 C7 -3.82(11) . . . . ? 
C5 C6 C7 C8 1.09(19) . . . . ? 
C1 C6 C7 C8 -177.49(10) . . . . ? 
C5 C6 C7 C12 178.71(11) . . . . ? 
C1 C6 C7 C12 0.14(11) . . . . ? 
C12 C7 C8 C9 -2.02(15) . . . . ? 
C6 C7 C8 C9 175.36(10) . . . . ? 
C7 C8 C9 C10 0.60(16) . . . . ? 
C8 C9 C10 C11 0.95(17) . . . . ? 
C9 C10 C11 C12 -1.07(16) . . . . ? 
C10 C11 C12 C7 -0.35(16) . . . . ? 
C10 C11 C12 C13 -179.85(10) . . . . ? 
C8 C7 C12 C11 1.93(15) . . . . ? 
C6 C7 C12 C11 -175.96(9) . . . . ? 
C8 C7 C12 C13 -178.49(9) . . . . ? 
C6 C7 C12 C13 3.61(11) . . . . ? 
C11 C12 C13 O1 51.80(14) . . . . ? 
C7 C12 C13 O1 -127.74(9) . . . . ? 
C11 C12 C13 C14 -70.54(14) . . . . ? 
C7 C12 C13 C14 109.92(10) . . . . ? 
C11 C12 C13 C1 174.04(10) . . . . ? 
C7 C12 C13 C1 -5.50(10) . . . . ? 
C2 C1 C13 O1 -55.02(14) . . . . ? 
C6 C1 C13 O1 127.32(9) . . . . ? 
C2 C1 C13 C12 -176.73(10) . . . . ? 
C6 C1 C13 C12 5.60(10) . . . . ? 
C2 C1 C13 C14 64.81(13) . . . . ? 
C6 C1 C13 C14 -112.85(9) . . . . ? 
O1 C13 C14 C19 25.09(13) . . . . ? 
C12 C13 C14 C19 150.51(10) . . . . ? 
C1 C13 C14 C19 -98.60(11) . . . . ? 
O1 C13 C14 C15 -158.60(10) . . . . ? 
C12 C13 C14 C15 -33.18(14) . . . . ? 
C1 C13 C14 C15 77.72(12) . . . . ? 
C19 C14 C15 C16 -1.40(17) . . . . ? 
C13 C14 C15 C16 -177.74(11) . . . . ? 
C14 C15 C16 C17 0.09(19) . . . . ? 
C15 C16 C17 C18 1.59(19) . . . . ? 
C16 C17 C18 C19 -1.88(17) . . . . ? 
C16 C17 C18 C18 179.09(12) . . . 2_666 ? 
C15 C14 C19 C18 1.07(16) . . . . ? 
C13 C14 C19 C18 177.42(9) . . . . ? 
C17 C18 C19 C14 0.55(15) . . . . ? 
C18 C18 C19 C14 179.57(11) 2_666 . . . ? 
C4A O1A C1A C2A -58.43(13) . . . . ? 
C3A O2A C2A C1A -56.59(12) . . . . ? 
O1A C1A C2A O2A 57.58(12) . . . . ? 
C2A O2A C3A C4A 57.01(13) . . . . ? 
C1A O1A C4A C3A 58.81(13) . . . . ? 
O2A C3A C4A O1A -58.45(13) . . . . ? 
C2B O1B C1B C2B -56.78(15) . . . 2_655 ? 
C1B O1B C2B C1B 56.88(15) . . . 2_655 ? 
 
_diffrn_measured_fraction_theta_max    0.997 
_diffrn_reflns_theta_full              29.10 
_diffrn_measured_fraction_theta_full   0.997 
_refine_diff_density_max    0.300 
_refine_diff_density_min   -0.241 
_refine_diff_density_rms    0.046 
